## RESEARCH ARTICLE

# Gene regulatory network controlling carpel number variation in cucumber

Gen Che<sup>1,\*</sup>, Ran Gu<sup>1,\*</sup>, Jianyu Zhao<sup>1,\*</sup>, Xiaofeng Liu<sup>1</sup>, Xiaofei Song<sup>2</sup>, Hailing Zi<sup>3</sup>, Zhihua Cheng<sup>1</sup>, Junjun Shen<sup>1</sup>, Zhongyi Wang<sup>1</sup>, Renyi Liu<sup>4</sup>, Liying Yan<sup>5</sup>, Yiqun Weng<sup>6</sup> and Xiaolan Zhang<sup>1,†</sup>

## ABSTRACT

The *WUSCHEL-CLAVATA3* pathway genes play an essential role in shoot apical meristem maintenance and floral organ development, and under intense selection during crop domestication. The carpel number is an important fruit trait that affects fruit shape, size and internal quality in cucumber, but the molecular mechanism remains elusive. Here, we found that *CsCLV3* expression was negatively correlated with carpel number in cucumber cultivars. *CsCLV3-RNAi* led to increased number of petals and carpels, whereas overexpression of *CsWUS* resulted in more sepals, petals and carpels, suggesting that *CsCLV3* and *CsWUS* function as a negative and a positive regulator for carpel number variation, respectively. Biochemical analyses indicated that *CsWUS* directly bound to the promoter of *CsCLV3* and activated its expression. Overexpression of *CsFUL1<sup>A</sup>*, a *FRUITFULL*-like MADS-box gene, resulted in more petals and carpels. *CsFUL1<sup>A</sup>* can directly bind to the *CsWUS* promoter to stimulate its expression. Furthermore, we found that auxin participated in carpel number variation in cucumber through interaction of *CsARF14* with *CsWUS*. Therefore, we have identified a gene regulatory pathway involving *CsCLV3*, *CsWUS*, *CsFUL1<sup>A</sup>* and *CsARF14* in determining carpel number variation in an important vegetable crop – cucumber.

**KEY WORDS:** Cucumber, *CsCLV3*, *CsWUS*, Carpel number, *CsFUL1<sup>A</sup>*, Auxin

## INTRODUCTION

Fruits and seeds are the predominant sources of food in our diets. To meet the increasing food demand, crop plants have undergone intense human selection for larger fruits and more seeds (Doebley et al., 2006; Kuittinen and Aguade, 2000). Flowers are the reproductive structures that give rise to fruits and seeds in higher plants. In the model plant *Arabidopsis thaliana*, the flower

comprises four floral organs, sepals, petals, stamens and carpels, arranged in circular whorls from outer to inner most (Smyth et al., 1990). Cucumber (*Cucumis sativus* L.) is a world-wide cultivated vegetable crop in the Cucurbitaceae family bearing unisexual flowers. The cucumber fruit develops from the female flower in the leaf axil that typically consists of five sepals, five petals, three fused carpels and five suppressed stamens (Bai et al., 2004), and can be consumed freshly or processed into pickles at 8–18 days after anthesis (Weng et al., 2015). The carpel number (CN) is an important fruit trait that affects fruit shape, fruit size and internal quality in cucumber. In natural cucumber populations, carpel number (CN) can vary from two to seven (Li et al., 2016). An increase in carpel number (CN) is usually concomitant with enlargement of fruit diameter, and therefore results in changes in fruit shape, size and/or flavor. For example, most cultivated cucumbers bear cylindrical fruits that generally have three carpels (CN=3), whereas many cultivars in the Xishuangbanna region bear spherical fruits with CN=5 (Li et al., 2016). The CN of fruits is determined early in the floral meristem development, in which *WUSCHEL* (*WUS*)-*CLAVATA3* (*CLV3*) pathway genes play essential roles and have been under selection during crop domestication (Somssich et al., 2016). For example, the ancestor of tomato had only two locules (carpels) and the fruit was small, but modern cultivars have eight or more locules, owing to natural mutations of *WUS-CLV* signaling genes (Somssich et al., 2016). Similarly, in maize, disturbance of *WUS-CLV* pathways genes resulted in more kernel rows and higher yields (Bommert et al., 2013b; Je et al., 2016). However, the function of *WUS-CLV* pathway in carpel number variation remain largely unknown in cucumber.

The role of *WUS-CLV* pathway in shoot apical meristem (SAM) maintenance and floral organ development is well studied in *Arabidopsis*. *CLAVATA3* (*CLV3*) is the founding member of the *CLAVATA3/EMBRYO SURROUNDING REGION* (ESR)-related (CLE) peptide family (Cock and McCormick, 2001). The proteins encoded by *CLV3* is a secreted peptide ligand that is required for stem cell maintenance in the SAM (Rojo et al., 2002). Overexpression of *CLV3* results in premature termination of the SAM, whereas loss of function of *CLV3* leads to enlarged SAM with over-accumulation of stem cells and production of more floral organs (Brand et al., 2000; Mayer et al., 1998; Miwa et al., 2009). *CLV3* is specifically expressed in the stem cells in the central zone of the SAM and thus serves as a stem cell marker in *Arabidopsis* (Müller et al., 2006). *WUSCHEL* (*WUS*) encodes a homeodomain transcription factor with a homeodomain, a WUS-box motif and an ERF-associated amphiphilic repression (EAR) motif (van der Graaff et al., 2009). *WUS* is expressed in the organizing center (OC) underlying the central zone to promote stem cell activity by stimulating *CLV3* expression in a non-cell-autonomous manner (Lenhard and Laux, 2003). Overexpression of *WUS* led to ectopic floral buds (Xu et al., 2005), whereas knockout of *WUS* caused stem

<sup>1</sup>State Key Laboratories of Agrobiotechnology, Beijing Key Laboratory of Growth and Developmental Regulation for Protected Vegetable Crops, Department of Vegetable Sciences, China Agricultural University, Beijing 100193, China.

<sup>2</sup>Analysis and Testing Centre, Hebei Normal University of Science and Technology, Qinhuangdao 066004, China. <sup>3</sup>Shanghai Center for Plant Stress Biology, Shanghai Institutes for Biological Sciences, Chinese Academy of Sciences, Shanghai 201602, China. <sup>4</sup>Center for Agroforestry Mega Data Science and FAFU-UCR Joint Center for Horticultural Biology and Metabolomics, Haixia Institute of Science and Technology, Fujian Agriculture and Forestry University, Fuzhou 350002, China.

<sup>5</sup>College of Horticulture Science and Technology, Hebei Normal University of Science and Technology, Qinhuangdao 066004, China. <sup>6</sup>USDA-ARS, Vegetable Crops Research Unit, Horticulture Department, University of Wisconsin-Madison, 1575 Linden Drive, Madison, WI 53706, USA.

\*These authors contributed equally to this work

†Author for correspondence (zhxiaolan@cau.edu.cn)

DOI: 10.1242/dev.184788

cell depletion and arrest of organ initiation from the SAM (Laux et al., 1996). Inhibition of *WUS* expression at the floral meristem termination stage is required for gynoecium development and consequently affects the carpel number (CN) (Sun et al., 2009). As a feedback, *WUS* expression is restricted to the OC by the CLV signal transduction pathway involving CLV1, CLV2 and CLV3 (Brand et al., 2000; Schoof et al., 2000). *CLV1* encodes a leucine-rich repeat (LRR) receptor kinase with a transmembrane domain that acts as a key receptor to perceive and bind to CLV3 peptide (Clark et al., 1997; Ogawa et al., 2008). CLV2, a LRR receptor-like protein without a kinase domain (Jeong et al., 1999), interacts with another receptor-like kinase, CORYNE (CRN), to transmit CLV3 signal in parallel to CLV1 (Bleckmann et al., 2010; Guo et al., 2010; Müller et al., 2008; Zhu et al., 2010). The products of three *BARELY ANY MERISTEM* (*BAM*) genes, which are related to CLV1, appear to be indirect receptors of CLV3 in *Arabidopsis* (DeYoung et al., 2006). RECEPTOR LIKE PROTEIN KINASE2 (RPK2) acts as another LRR receptor of CLV3 signaling and functions redundantly with *CLV1*, *CLV2/CRN* and *BAM* pathways (Kinoshita et al., 2010; Replogle et al., 2013). Thus, the WUS-CLV regulatory circuitry forms a self-correcting mechanism that balances cell division and cell differentiation to maintain proper SAM size during continuous organogenesis.

In addition, the functions of *WUS* and *CLV3* have also been characterized in crops (Fletcher, 2018). In rice, the *WUS* ortholog *MONOCULM 3/TILLERS ABSENT 1/STERILE AND REDUCED TILLERING 1* (*MOC3/TAB1/SRT1*) is absent in the SAM but found in the premeristem zone that subsequently develop into axillary meristem (Shao et al., 2019). *OsWUS* knockouts failed to form tillers, and gave rise to disrupted inflorescence and spikelets (Lu et al., 2015; Tanaka et al., 2015). Mutation in the *FLORAL ORGAN NUMBER* (*FON2* or *FON4*), the *CLV3* ortholog in rice (Chu et al., 2006; Suzaki et al., 2006), leads to an enlarged SAM, inflorescence meristem and floral meristem (FM), and to an increased number of floral organs. In maize, *WUS* has two orthologs that display different expression patterns: *ZmWUS1* is expressed in the center of SAM, whereas *ZmWUS2* is expressed in leaf primordia (Nardmann and Werr, 2006). During tomato domestication, a regulatory mutation in *SICLV3*, named as the *fasciated* (*fas*) locus, played an important role in the increased fruit size in modern cultivars (Rodríguez-Leal et al., 2017; Xu et al., 2015). The *SICLV3* expression is mainly detected in the central cells of the SAM but is absent from the L1 layer. Knockdown of *SICLV3* leads to increase in floral organ number and enlargement of the SAM size (Xu et al., 2015). Additionally, gain-of-function mutation of *SIWUS* underlying the *locule number* (*lc*) locus gave rise to fruits with more locules (Chu et al., 2019; Muñoz et al., 2011; Nardmann and Werr, 2006; Rodríguez-Leal et al., 2017).

Several regulators have been identified as participating in the SAM maintenance and organ development through mediating the WUS-CLV pathway. The bHLH transcription factor gene *HECATE1* (*HEC1*) is directly repressed by *WUS*, which is a negative regulator of *CLV3* expression; low level of *HEC1* is required for stem cell integrity in *Arabidopsis* (Schuster et al., 2014). HAIRY MERISTEM (*HAM*), a GRAS-domain transcription factor physically interacts with *WUS* to confine *CLV3* expression in the stem cells in the SAM (Zhou et al., 2015, 2018). *HANABA TARUNU* (*HAN*) encodes a GATA-3-like protein that confines *WUS* expression to the OC cells (Zhang et al., 2013; Zhao et al., 2004). The maize *COMPACT PLANT2* (*CT2*) gene, which encodes a putative  $\alpha$ -subunit ( $G\alpha$ ) of a heterotrimeric GTP binding protein, functions in the perception of CLV3 peptide through its direct

interaction with the CLV2 ortholog FASCIATED EAR 2 (FEA2) (Bommert et al., 2013a). In tomato, mutations in arabinosyltransferase enzymes, including *REDUCED RESIDUAL ARABINOSE* (*RRA*) and *FASCIATED INFLORESCENCE* (*FIN*), caused upregulation of *CLV3* and *WUS* (Xu et al., 2015). In addition, several phytohormones participate in SAM activity via the WUS-CLV pathway. *WUS* negatively regulates cytokinin signaling by directly repressing response regulators *ARR5*, *ARR6*, *ARR7* and *ARR15* (Hwang and Sheen, 2001; Leibfried et al., 2005). Similarly, auxin accumulation is essential for lateral organ initiation from the peripheral zone of the SAM (Gaillochet et al., 2015). The auxin response factor (ARF) MONOPTEROS (MP) functions in the crosstalk of auxin and cytokinin pathways by repressing the expression of *ARR7* and *ARR15* (Zhao et al., 2010).

To reveal the molecular mechanism underlying carpel number variation in cucumber, we performed functional analyses of *WUS* and *CLV3* through genetic transformation. We found that *CsWUS* and *CsCLV3* act as a positive and a negative regulator for carpel number variation in cucumber, respectively. Furthermore, we identified a FRUITFUL-like MADS-box protein (*CsFUL1*) that regulates floral organ development through directly promoting *CsWUS* transcription. Auxin participates in carpel number variation in cucumber through physical interaction with *CsARF14* and *CsWUS*.

## RESULTS

### Sequence feature and phylogenetic analysis of *CsCLV3* and *CsWUS*

Previous studies showed that orthologs of *CLV3* (*FAS*) and *WUS* (*LC*) genes are the key regulators responsible for locule number increase during tomato domestication (Muñoz et al., 2011; Rodríguez-Leal et al., 2017; Xu et al., 2015). Map-based cloning indicated that *CsCLV3* is the candidate gene underlying carpel number variation in cucumber (Li et al., 2016). To characterize the biological functions of *CsCLV3* and *CsWUS*, we cloned the coding sequence from cucumber inbred line R1461. *CsCLV3* encodes a small peptide comprising a solo exon of 156 bp and *CsWUS* encodes a homeodomain protein consisting of three exons and two introns (Fig. 1A). *CLV3* is a member of the *CLE* gene family, with a conserved 14 amino acid domain termed the CLE box (Cock and McCormick, 2001). Protein alignment of *CLV3* homologs indicated that cucurbit *CLV3* proteins, including cucumber (*CsCLV3*) and melon (*CmCLV3*), are shorter than those in *Arabidopsis* (*AtCLV3*) and tomato (*SICLV3*) (Fig. 1B). There are 16 *CLE* family members in cucumber and 18 *CLE* genes in melon were identified by searching the Cucurbit Genomics Database. Phylogenetic analysis of *CLE* proteins showed that *CLV3* has only one homolog *CsCLV3* in cucumber (Fig. S1). *WUS* belongs to the *WUS* clade of *WOX* family, which typically has four conserved domains: homeodomain, acidic domain, *WUS*-box and *EAR*-motif (van der Graaff et al., 2009). Sequence alignment showed that the homeodomain, *WUS*-box and *EAR*-motif of *CsWUS* are highly conserved, whereas the acidic domain is quite divergent (Fig. 1B).

### Expression pattern of *CsCLV3* and *CsWUS* in cucumber

Previous studies indicated that *CLV3* was specifically expressed in stem cells of the shoot apical meristem (SAM) and floral meristem (FM) in *Arabidopsis* and rice (Chu et al., 2006; Fiers et al., 2005). To investigate the expression pattern of *CsCLV3* in cucumber, we performed *in situ* hybridization in SAM, FM and flowers at different developmental stages. Interestingly, transcripts of *CsCLV3* were specifically enriched in the central region of SAM



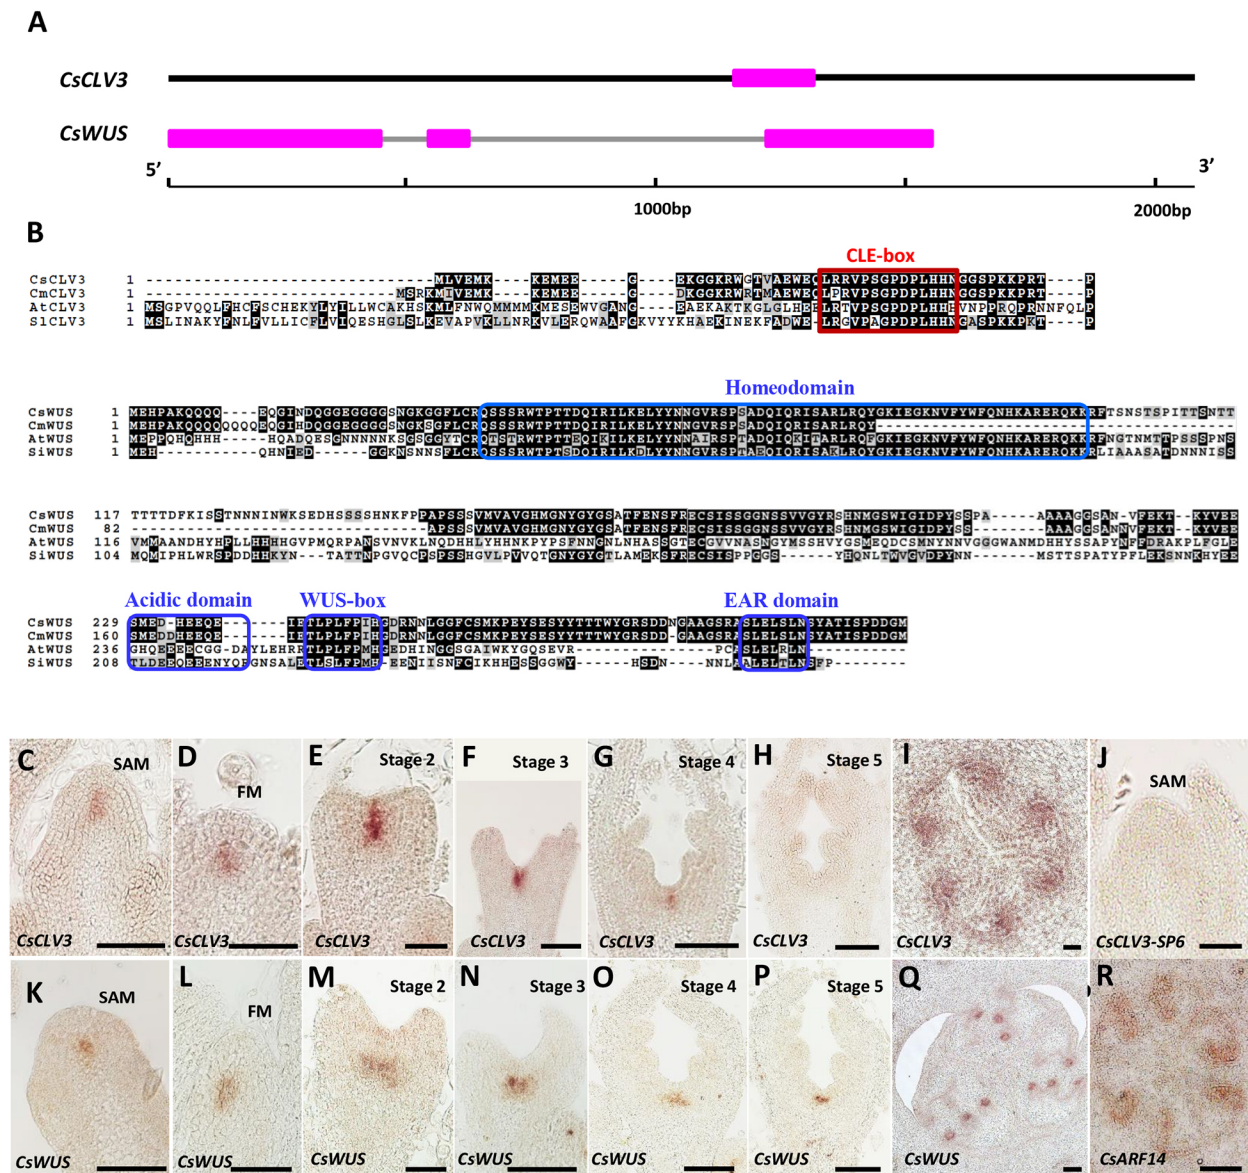

**Fig. 1. Sequence features and expression analyses of *CsCLV3* and *CsWUS* in cucumber.** (A) *CsCLV3* encodes a small peptide with only one exon (pink box). Black lines indicate the 1156 bp promoter region and 776 bp downstream sequence. *CsWUS* encodes a homeodomain transcription factor with three exons and two introns. Pink boxes indicate the exons and gray lines indicate the introns. (B) Protein sequence alignment of *CsCLV3* and *CsWUS* in cucumber, melon, *Arabidopsis* and tomato. The red frame indicates the conserved CLE box in *CsCLV3*. The blue boxes show the conserved homeodomain, acidic domain, WUS-box and EAR-motif in *CsWUS*. (C-R) *In situ* hybridization analysis of *CsCLV3* (C-J), *CsWUS* (K-Q) and *CsARF14* (R) in cucumber. (C,D) *CsCLV3* is expressed in the middle of the central zone of the shoot apical meristem (SAM) (C) and floral meristem (FM) (D). (E-H) *CsCLV3* signal was detected throughout the central zone in the developing floral primordia at stage 2, and gradually became weaker from stage 3 to stage 5. (I) High levels of expression of *CsCLV3* were found in developing ovules in a cucumber female flower. (J) Negative control of *CsCLV3* hybridized with the sense probe in the SAM. (K-Q) *CsWUS* signal was detected in the putative stem cell organizing center of the SAM (K), FM (L) and floral buds (M-P), as well as in the nucellus of ovules (Q). (R) *CsARF14* was expressed in the placenta and ovule primordium in the ovary. Scale bars: 100  $\mu$ m.

and FM, but were absent in stem cells (Fig. 1C,D). As the flower primordia develop, *CsCLV3* transcripts extended upward to the stem cells at the apex of FM from stage 2-3 (Fig. 1E,F) (Bai et al., 2004). The *CsCLV3* signal became weaker at stage 4 and disappeared by stage 5 (Fig. 1G,H). In cross-sections of cucumber young fruit, strong *CsCLV3* signals were found in developing ovules (Fig. 1I). As a control, no signal was detected upon hybridization with the sense *CsCLV3* probe (Fig. 1J). The expression pattern of *CsCLV3* appears to be similar to that of *WUS* in the SAM and FM (Brand et al., 2000; Yadav et al., 2011). For comparison, *in situ* hybridization was performed for *CsWUS*. Our

data showed that *CsWUS* transcripts were specifically accumulated in the central region underneath the central zone in the SAM and FM (Fig. 1K,L), a region overlapping with that of *CsCLV3* (Fig. 1C,D). In the flower buds, *CsWUS* signal was maintained in a group of cells beneath the stem cells (Fig. 1M-P). In ovary, *CsWUS* was expressed in ovules in cucumber (Fig. 1Q).

### ***CsCLV3* negatively regulates floral organ number in cucumber**

Commercial cucumbers generally have three carpels (CN=3), but CN can vary from two to five in different cultivars (Fig. 2A). To

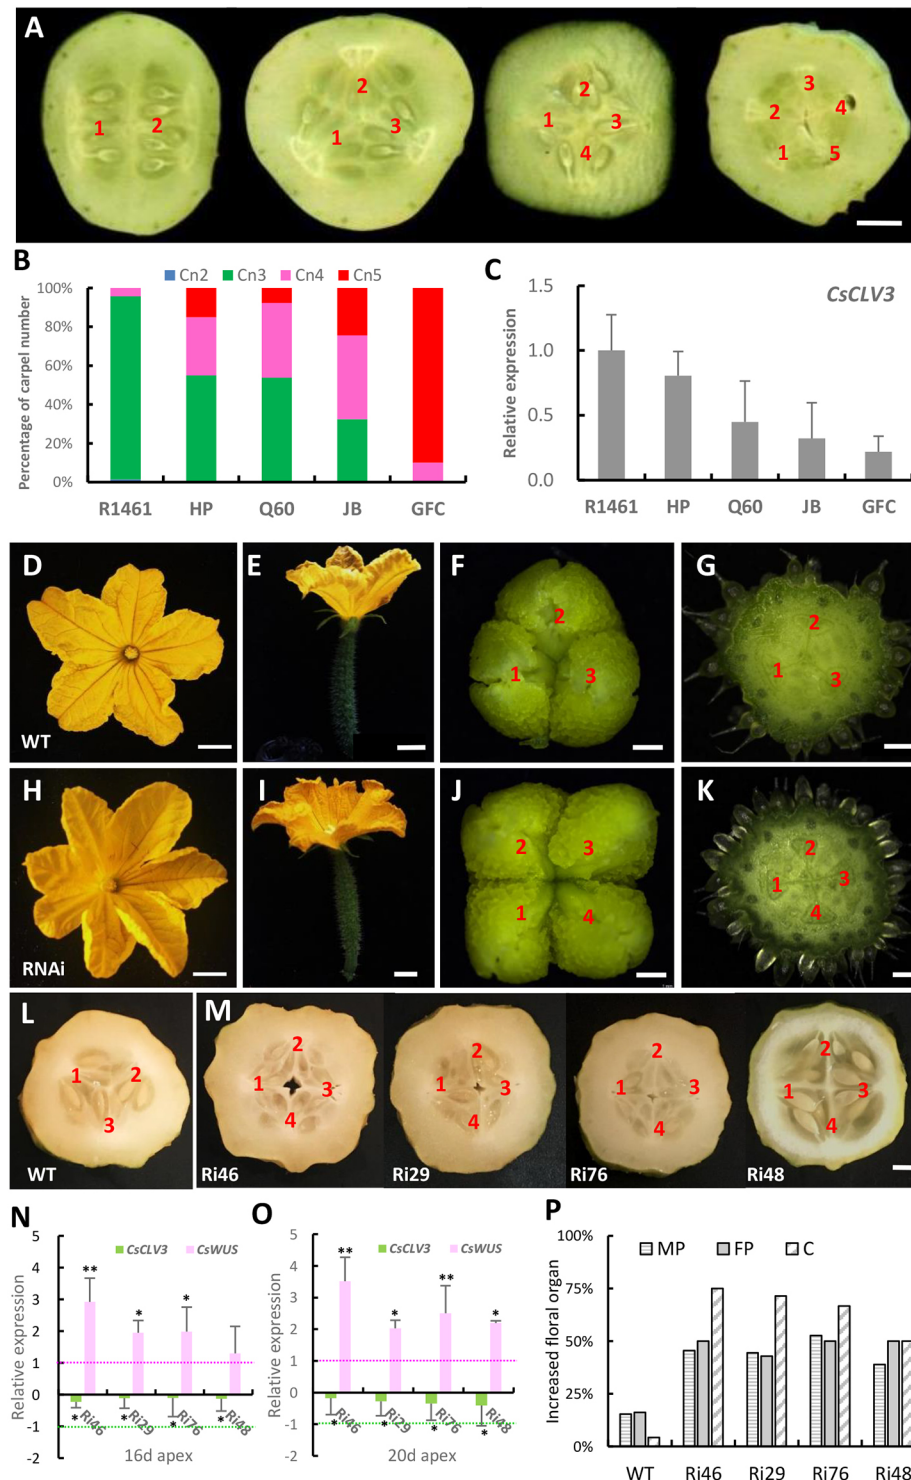

**Fig. 2. *CsCLV3* negatively regulates floral organ number in cucumber.** (A) Cross-sections of cucumber cultivars with two to five carpels. (B) Five cucumber cultivars with different CN variation. (C) *CsCLV3* expression in different cucumber cultivars. (D-M) Knockdown of *CsCLV3* by RNAi led to more floral organs in cucumber flowers. (D,H) Male flowers. (E,I) Female flowers. (F,J) Stigmas. (G,K) Cross-sections of young fruits. (L,M) Cross-sections of mature fruits in empty vector control (L) and four *CsCLV3*-RNAi transgenic lines (M). (N,O) Expression analyses by qRT-PCR of *CsCLV3* and *CsWUS* in the 16-day and 20-day apex of *CsCLV3*-RNAi transgenic lines. The green and pink dotted lines indicate the expression of *CsCLV3* and *CsWUS* in wild-type plants, respectively. (P) The frequency of increased floral organ number in wild-type and *CsCLV3*-RNAi transgenic lines. MP, male flower petal number; FP, female flower petal number; C, carpal number. Scale bars: 1 cm in A,D,E,H,I,L,M; 1 mm in F,G,J,K. Red numbers indicate carpal. Data are means  $\pm$  s.e.m. in N,O. \* $P < 0.05$ ; \*\* $P < 0.01$ . Three biological replicates and three technique replicates were performed for each qRT-PCR analyses.

dissect the biological function of *CsCLV3* in carpal number variation, we performed qRT-PCR in 16-day-old seedling apices of five cucumber cultivars with different CN frequency (Fig. 2B,C). The expression of *CsCLV3* was found to be negatively correlated with CN variation (Fig. 2C). In the GFC line with mostly CN=5, the expression of *CsCLV3* decreased to 21% when compared with that in the R1461 line with predominantly CN=3 (Fig. 2C).

To further verify the negative role of *CsCLV3* in CN variation, we obtained 12 transgenic cucumber lines using cauliflower mosaic virus 35S (35S) promoter followed with a double-stranded RNA

interference (RNAi) construct containing the whole-length coding sequence of *CsCLV3* (*CsCLV3*-RNAi), and chose four representative lines for further characterization. In the control plants, both male and female flowers have five petals (Fig. 2D,E), and there are three stigmas and three carpels in the female flower (Fig. 2F,G). In the *CsCLV3*-RNAi lines, the number of floral organs was greatly increased, including more petals, stigmas and carpels (Fig. 2H-M). Expression analysis indicated that transcripts accumulation of *CsCLV3* decreased to 13–32% of that in wild type, and *CsWUS* expression significantly upregulated two to threefold in the 16-day



and 20-day apex of *CsCLV3-RNAi* plants (Fig. 2N,O), consistent with the negative feedback of CLV3 on WUS in *Arabidopsis* (Brand et al., 2002; Müller et al., 2006; Schoof et al., 2000). Correspondingly, phenotypic severity positively correlates with *CsCLV3* knockdown (Fig. 2P). In the most severe line Ri46, over 45% male flowers have seven petals and 75% female flowers have four carpels (Fig. 2P). Therefore, *CsCLV3* acts as an important repressor for floral organ specification in cucumber, especially for petal and carpel development.

### *CsWUS* positively regulates carpel number variation in cucumber

Previous study showed that gain-of-function of *LC (WUS)* resulted in a high locule-number phenotype in tomato (Chu et al., 2019). To

explore the biological function of *CsWUS* in cucumber, we generated overexpression lines of *CsWUS* driven by the 35S promoter. A total of five transgenic lines were obtained and three lines (OX-3, OX-5 and OX-9) were chosen for phenotypic observation. When compared with the vector control (WT), *CsWUS*-OX transgenic plants bore flowers with more floral organs, including increased number of sepals, petals and carpels (Fig. 3A-F). Statistical analysis indicated that the frequency of increased numbers of floral organs was significantly higher in the *CsWUS*-OX lines (Fig. 3G). These data suggest that *CsWUS* acts as a positive regulator of floral organ number in cucumber. Expression analysis showed that transcript accumulation of *CsWUS* and *CsCLV3* were significantly elevated in *CsWUS*-OX transgenic plants (Fig. 3H,I), consistent with the positive regulation of *CLV3*

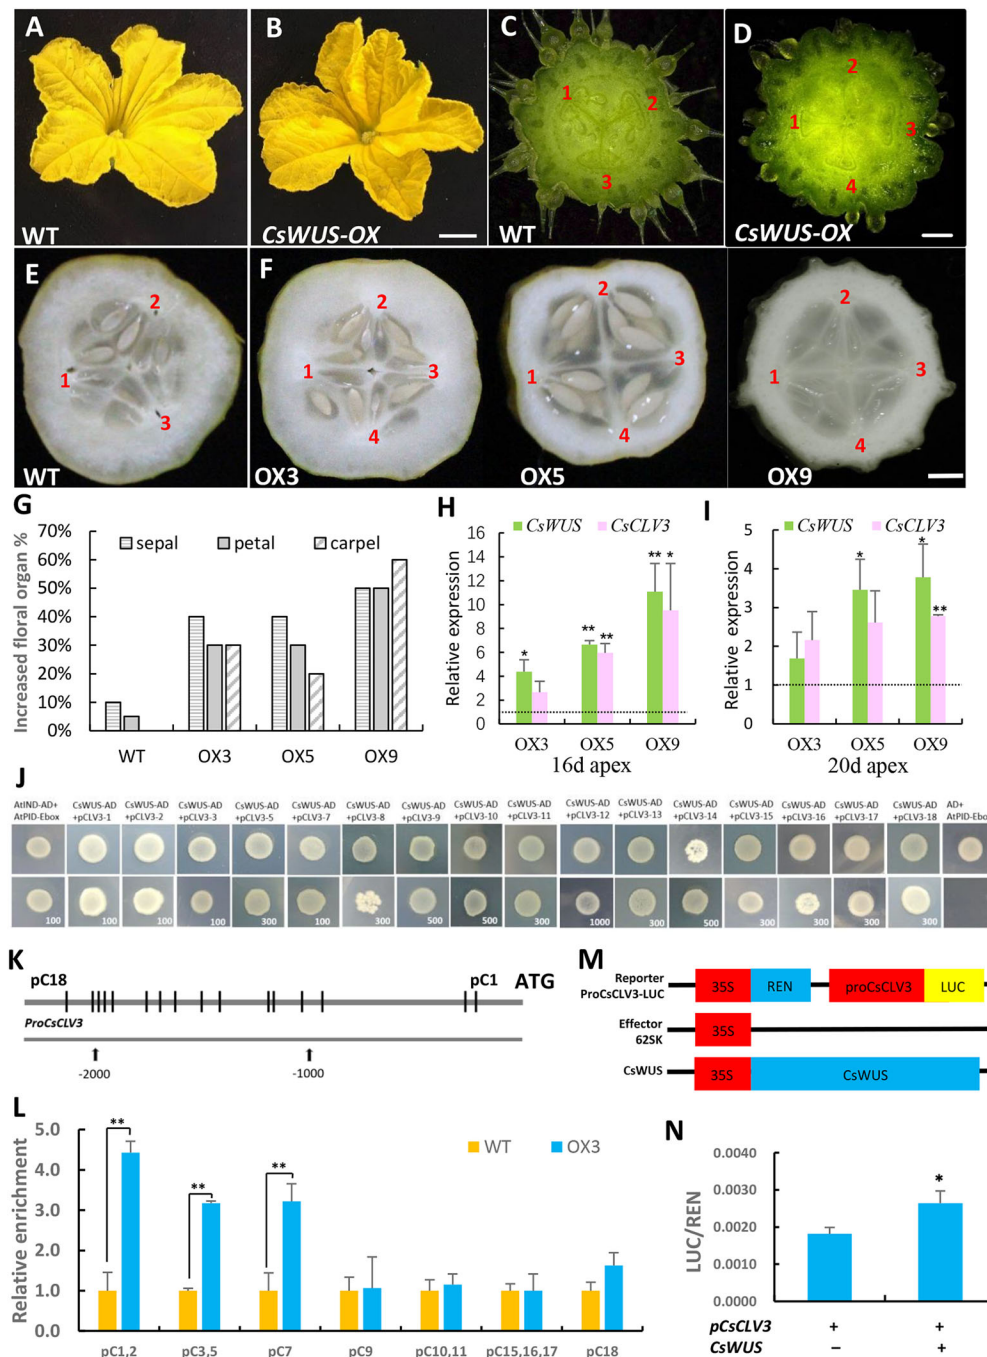

expression by WUS in *Arabidopsis* (Ikeda et al., 2009; Müller et al., 2006; Yadav and Reddy, 2012).

Considering *CsCLV3* and *CsWUS* display overlapping expression patterns in the SAM and FM in cucumber, we performed protein-DNA interaction assays to examine whether interaction exists between them. In *Arabidopsis*, WUS binds to the *cis* element (TAAT box) to regulate *CLV3* expression (Perales et al., 2016). A total of 20 conserved TAAT boxes were found in the ~2500 bp upstream of *CsCLV3* sequence. Y1H assay showed that *CsWUS* can bind to 16 fragments containing the TAAT-box motif in *CsCLV3* promoter (Fig. 3J,K). To verify the binding of *CsWUS* to *CsCLV3* promoter *in vivo*, chromatin immunoprecipitation (ChIP) combined with qPCR analysis (ChIP-qPCR) was performed using anti-myc antibodies in *CsWUS*-myc transgenic cucumber. The results showed that the three fragments (pC1,2, pC3,5 and pC7) had

significant enrichment in the immunoprecipitated DNA of *CsWUS* when compared with wild type (Fig. 3L), indicating the direct binding of *CsWUS* to the *CsCLV3* promoter. A LUC transcription assay also showed that LUC activity was significantly enhanced upon co-transformation of 35S:*CsWUS* with *ProCsCLV3*:LUC in tobacco leaves (Fig. 3M,N), verifying the direct interaction between *CsWUS* and *CsCLV3*.

### ***CsFUL1* participates in floral organ development through directly promoting *CsWUS* activity in cucumber**

In our previous study, a FRUITFUL-like MADS-box transcription factor *CsFUL1<sup>A</sup>*, but not *CsFUL1<sup>C</sup>*, was found to be the functional allele for fruit length repression in cucumber (Zhao et al., 2019). Overexpression of *CsFUL1<sup>A</sup>* (*CsFUL1<sup>A</sup>-OX*) led to flowers with increased floral organs, including more petals, stamens and carpels

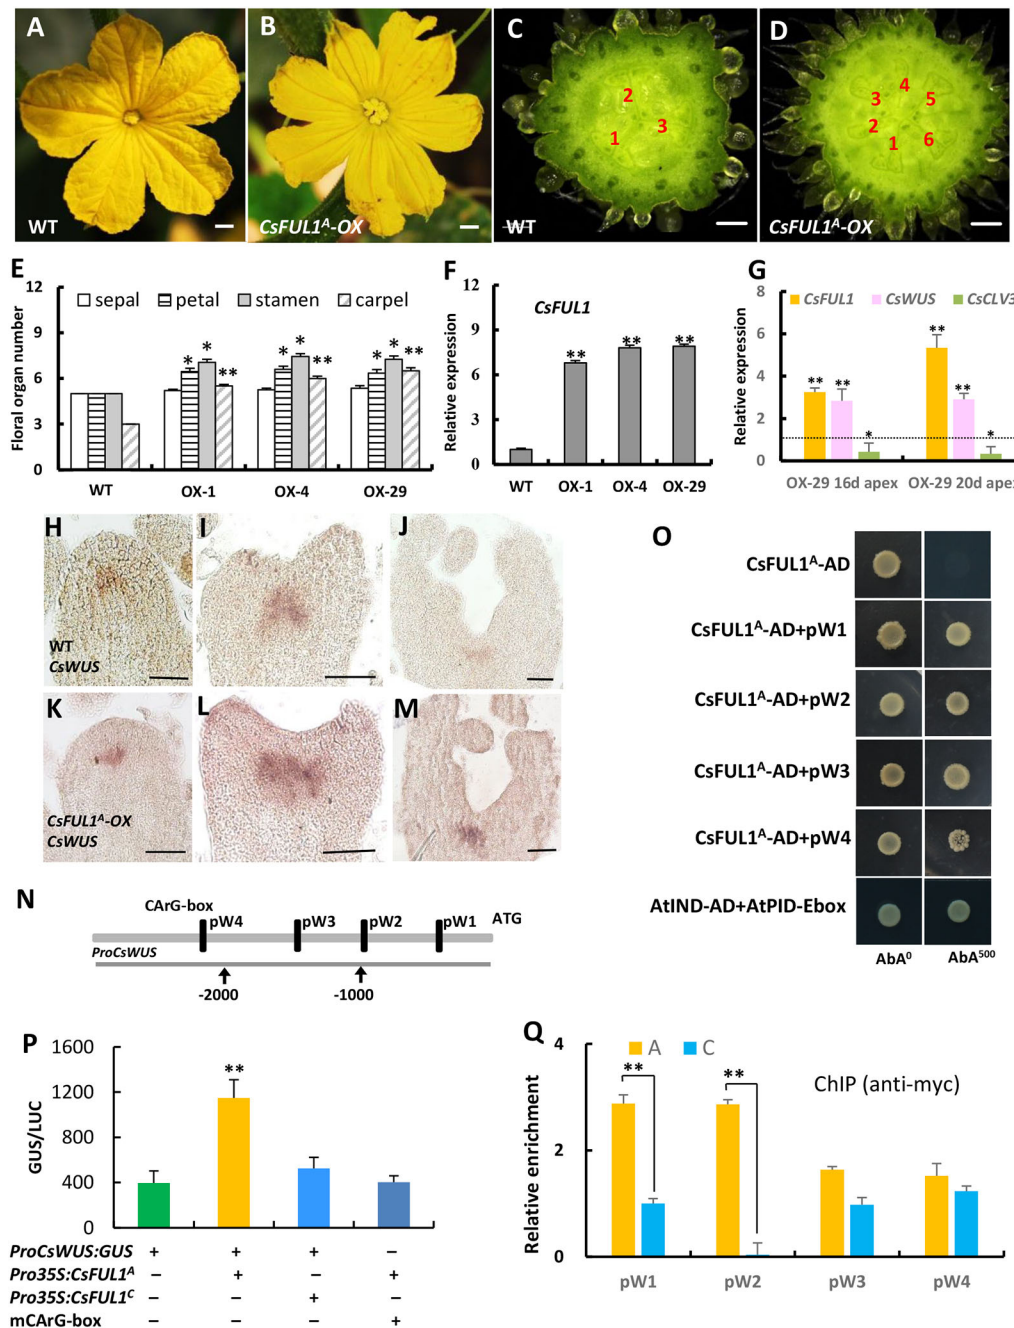

**Fig. 4. *CsFUL1<sup>A</sup>* contributes to more floral organ numbers by directly stimulating *CsWUS* expression in cucumber.** (A,B) Top view of male flowers in wild type (A) and the 35S:*CsFUL1<sup>A</sup>* line (B). (C,D) Cross-section of ovaries at anthesis between wild type (C) and the 35S:*CsFUL1<sup>A</sup>* line (D). (E) Statistical analysis of the numbers of sepals, petals and stamens in male flowers, and the number of carpels in female flowers in wild-type and 35S:*CsFUL1<sup>A</sup>* lines. \**P*<0.05 and \*\**P*<0.01 compared with wild type. (F) qRT-PCR analysis of *CsFUL1* in young fruits of wild type and the 35S:*CsFUL1<sup>A</sup>* transgenic lines OX-1, OX-4 and OX-29. (G) Expression analysis of *CsFUL1*, *CsWUS* and *CsCLV3* in 16-day and 20-day apices of wild-type and OX-29 transgenic plants by qRT-PCR. The values in wild-type plants were set as 1 (dotted line). (H-M) mRNA *in situ* hybridization of *CsWUS* in SAM and developing flowers of wild-type (H-J) and OX-29 transgenic plants (K-M). (N) Schematic diagram of the promoter fragments of *CsWUS* containing the CA<sub>2</sub>G-box motif used for Y1H assay and ChIP-qPCR. (O) Y1H assay showing that *CsFUL1<sup>A</sup>* directly binds to the promoter fragments of *CsWUS* containing the CA<sub>2</sub>G-box motif. Basal concentrations of AbA were 0 (left) and 500 (right) ng/ml. (P) GUS activity measurement in tobacco leaves after transient expression of *ProCsWUS*:GUS with *Pro35S*:*CsFUL1<sup>A</sup>* or *Pro35S*:*CsFUL1<sup>C</sup>*, and *ProCsWUS*<sup>mCarG-box</sup>:GUS with *Pro35S*:*CsFUL1<sup>A</sup>*. Data are mean±s.e.m. (*n*=4; \*\**P*<0.01 compared with *ProCsWUS*:GUS control). (Q) ChIP-PCR showing the *in vivo* binding of *CsFUL1<sup>A</sup>* and *CsFUL1<sup>C</sup>* to *CsWUS* promoter fragments. Scale bars: 5 mm in A-D; 50 µm in H-M. \*\**P*<0.01 compared with *CsFUL1<sup>C</sup>*-myc DNA enrichment.



(Fig. 4A–D). The severe *CsFUL1<sup>A</sup>* overexpression line (OX-29) can generate flowers with eight petals and six carpels. Quantification analysis indicated that the degree of floral organ increases positively correlates with *CsFUL1<sup>A</sup>* expression levels (Fig. 4E,F). For example, the average carpel number was 3.0 in the wild-type plant, whereas it changed to an average of 6.5 in the severe line OX-29 (Fig. 4E,F). To explore whether *CsFUL1<sup>A</sup>* regulates floral organ development through the classical WUS-CLV pathway, we examined the expression of *CsWUS* and *CsCLV3* by qRT-PCR in the apex of *CsFUL1<sup>A</sup>*-OX plants (Fig. 4G). *CsWUS* transcription was significantly induced, whereas the expression of *CsCLV3* was decreased in the *CsFUL1*-OX plants (Fig. 4G). Next, *in situ* hybridization of *CsWUS* was performed in the shoot apex of wild-type and *CsFUL1<sup>A</sup>*-OX plants (Fig. 4H–J). The signal of *CsWUS* was largely enhanced and expanded in the developing flowers of *CsFUL1<sup>A</sup>*-OX (Fig. 4H–M).

To dissect the mechanism of *CsFUL1* regulating the WUS-CLV pathway, putative binding sites (CARG-boxes) of *CsFUL1* were identified in promoters of *CsCLV3* and *CsWUS* (Smaczniak et al., 2012). Protein-DNA interactions between *CsFUL1* and WUS-CLV pathway genes were examined with Y1H assays (Fig. 4N,O). Our data showed that *CsFUL1<sup>A</sup>* can bind to four pW1–pW4 fragments containing the CARG-box motif in *CsWUS* promoter (Fig. 4O). Next, we performed a GUS transactivation assay to investigate the interaction of *CsFUL1* and *CsWUS* in tobacco leaves. Our data indicated that the GUS activity was dramatically increased upon co-transformation of Pro35S:*CsFUL1<sup>A</sup>* and Pro*CsWUS*:*GUS*, whereas no significant changes were detected upon co-transformation of Pro35S:*CsFUL1<sup>C</sup>* and Pro*CsWUS*:*GUS* or upon co-transformation of Pro35S:*CsFUL1<sup>A</sup>* with a CARG-box mutated *CsWUS* promoter (Pro*CsWUS<sup>SmCARG-box</sup>*) (Fig. 4P), suggesting that *CsFUL1<sup>A</sup>* may stimulate the expression of *CsWUS* in cucumber. To explore the *in vivo* binding of *CsFUL1* to *CsWUS* promoter, ChIP-qPCR was performed using anti-myc antibodies in *CsFUL1<sup>A</sup>*-myc and *CsFUL1<sup>C</sup>*-myc transgenic plants. Our data indicated that the pW1 and pW2 fragments displayed significant enrichment in the immunoprecipitated DNA of *CsFUL1<sup>A</sup>* when compared with *CsFUL1<sup>C</sup>* (Fig. 4Q), suggesting the direct binding of *CsFUL1<sup>A</sup>* to the *CsWUS* promoter to stimulate *CsWUS* expression in regulation of floral organ development in cucumber.

### Auxin signaling is involved in cucumber carpel number regulation

Previous studies have identified that *CsCLV3* controls carpel number variation of cucumber using mapping populations derived from WI2757 (CN=3) and True Lemon (CN=5). There are 11 single nucleotide polymorphism (SNPs) between WI2757 and True Lemon, in which one SNP was confirmed to be crucial for carpel number variation (Li et al., 2016). We identified a spontaneous mutant Gui Fei Cui (GFC) from South China type cucumber 32X, in which the CN changed from 3 in 32X to 5 in GFC, despite the number of other floral organs, such as sepal, petal and stamen remain unchanged (Fig. 5A,B). Sequence cloning of *CsCLV3* in 32X and GFC indicated that they share the same 10 SNPs in WI2757 and True Lemon, including the most important SNP in the coding region associated with the carpel number variation (red box in Fig. S2). Additionally, there are two deletions (2 bp and 1 bp, respectively) in the promoter region and two deletions (3 bp and 4 bp, respectively) in the downstream genomic regions of *CsCLV3*, suggesting that *CsCLV3* is responsible for the carpel number increase in the GFC mutant. As expected, *CsCLV3* expression was significantly reduced in GFC when compared with 32X, especially

in the fruit at anthesis (Fig. 5C), which is consistent with the negative role of *CsCLV3* in regulation of carpel number variation in cucumber (Fig. 2). We examined *CsWUS* expression and found that it was upregulated in GFC when compared with 32X (Fig. 5D), supporting the notion of *CsCLV3* negative feedback on the transcription of *CsWUS* in cucumber.

To identify the downstream targets and gene pathways mediated by *CsCLV3*, we performed transcriptomic analysis by RNA-seq using fruit samples at anthesis from 32X and GFC (Fig. S3). When compared with GFC, 627 and 160 genes were up- and downregulated, respectively, in 32X (Table S1 and S2). Gene Ontology (GO) term enrichment analysis showed that sequence-specific DNA binding transcription factors were significantly enriched in upregulated genes in 32X (Fig. S3A), in which, genes in the AP2/ERF, C2H2, MYB, HB, bHLH, C2C2 family proteins occupied the majority (Fig. S3B,C). Previous studies have shown that AP2/ERF, MYB and bHLH family members play important roles in regulating plant growth and development through modulating multiple phytohormone signals, such as auxin, cytokinin and abscisic acid (Gu et al., 2017; Qi et al., 2015). We found many hormone-related genes were upregulated in 32X, such as auxin-responsive factors, cytokinin oxidase, response regulators, ethylene response factors and jasmonate-zim-domain proteins (Table S2).

To explore the role of hormones in *CsCLV3*-mediated carpel number variation, we measured the contents of auxin (IAA: 3-Indole acetic acid), cytokinin (ZR: trans-zeatin riboside), abscisic acid (ABA), gibberellins (GA3), jasmonic acid (JA) and brassinosteroid (BR) in fruits at anthesis in 32X (CN=3) and GFC (CN=5). Our data showed that the IAA and ABA levels were greatly reduced in the GFC when compared with 32X, and no significant differences were observed for ZR, GA3, JA and BR (Fig. 5E; Fig. S4). To visualize the distribution of IAA in cucumber, we performed IAA immunolocalization in transverse sections of 32X and GFC ovaries. IAA signals were found in the septum, vascular bundles and ovules of 32X. In GFC, the IAA signals were reduced (Fig. 5F), consistent with the decreased auxin accumulation (Fig. 5E). To investigate whether the increase of carpel number in GFC is related to the auxin signaling pathway, we examined the protein-protein interactions using Y2H and BiFC for *CsARF1*, *CsARF3*, *CsARF4*, *CsARF5*, *CsARF12*, *CsARF13*, *CsARF14*, *CsARF17*, *CsPIN1* with *CsCLV3* and *CsWUS*, respectively. Our data showed that only *CsARF14* can bind to *CsWUS* in both assays (Fig. 5G,H). We examined *CsARF14* expression by qRT-PCR and found that transcript accumulation of *CsARF14* was elevated in GFC and *CsWUS*-OX plants (Fig. 5I,J), displaying a positive correlation with carpel numbers. Next, *in situ* analysis indicated that transcripts of *CsARF14* are enriched in developing ovaries (Fig. 1R), a pattern that overlaps *CsCLV3* and *CsWUS*, suggesting that auxin participates in carpel number variation through the *CsARF14*-mediated WUS-CLV pathway in cucumber.

## DISCUSSION

### *CsCLV3* and *CsWUS* regulates carpel number variation in cucumber

The carpel number (CN) is an important fruit trait affecting fruit shape, fruit size and internal quality in horticultural crops. In cucumber, five-carpel fruits generally are rounder than three-carpel fruits (Weng et al., 2015). The roles of *CLV3* in specifying the meristem size and flower organ numbers have been well documented (Soyars et al., 2016). In *Arabidopsis*, mutation of *CLV3* resulted in enlarged meristem size and increased number of all

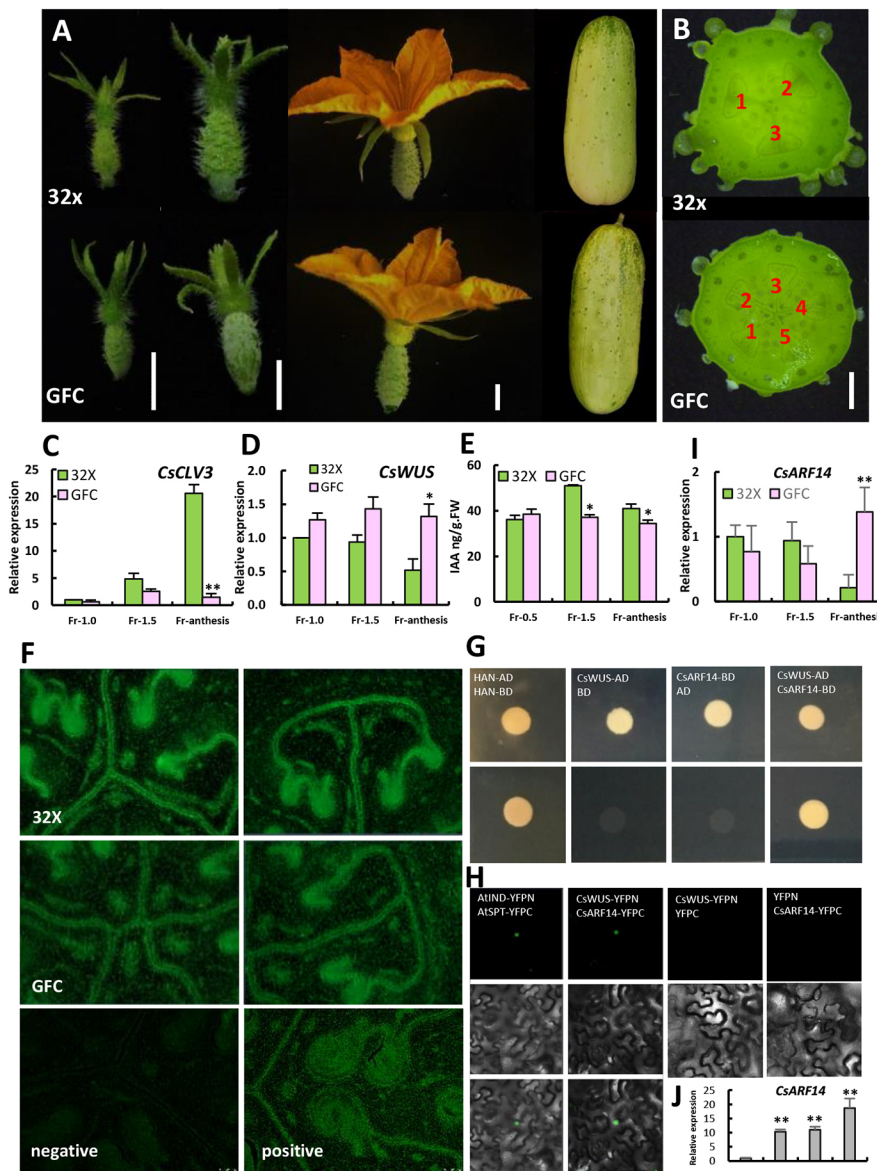

**Fig. 5. The *CsCLV3*-*CsWUS* pathway regulates carpel number through the auxin response in cucumber.** (A) Images of fruits at different developmental stages in inbred line 32X (Cn=3) and its mutant Gui Fei Cui (GFC) (CN=5). (B) Cross-section of fruits in 32X and GFC. (C,D) Expression analysis of *CsCLV3* and *CsWUS* in young fruits of 32X and GFC by qRT-PCR. Fr-1.0 and Fr-1.5 represent ovaries at 1.0 cm length and 1.5 cm length, respectively. Fr-anthesis indicates young fruit at anthesis. Data are mean $\pm$ s.e.m. \* $P$ <0.05 and \*\* $P$ <0.01 compared with 32X. (E) IAA (3-indoleacetic acid) content in young fruits at different developmental stages in 32X and GFC. \* $P$ <0.05 and \*\* $P$ <0.01 compared to 32X. (F) IAA immunolocalization in cross-sections of cucumber ovaries at 1.5 cm length. The negative and positive control images of ovary in wild type were taken under the same exposure time and settings (Liu et al., 2018). (G,H) Protein interaction between *CsWUS* and *CsARF14* was detected by Y2H (G) and BiFC assays (H). (I,J) Expression analysis of *CsARF14* in young fruits of GFC (I) and *CsWUS*-OX (J) plants by qRT-PCR.

four types of floral organs (Fletcher et al., 1999; Müller et al., 2006; Schoof et al., 2000). In rice, loss of function of *FON2* caused an increase in floral organ number (Suzaki et al., 2006). In maize, a *Mutator* insertion in *ZmFCP1* displayed fasciated ear phenotype (Je et al., 2016). In tomato, knockdown of *SlCLV3* showed branched and fasciated flowers and fruits with much more locules inside (Xu et al., 2015). *BrCLV3* was identified as conferring the multilocular trait in *Brassica rapa* (Fan et al., 2014). In *Lotus japonicus*, knockdown of *LjCLV3* resulted in meristem enlargement and increased ratio of flower number per peduncle (Okamoto et al., 2011). Here, we found that expression of *CsCLV3* is negatively correlated with carpel number variation in different cucumber cultivars, and downregulation of *CsCLV3* by RNAi led to increased numbers of petals and carpels (Fig. 2), suggesting that *CsCLV3* functions as a repressor for floral organ number in cucumber (Fig. 6). Furthermore, phenotypic variations exist among different alleles of *CsCLV3*. In the near isogenic lines GFC (CN=5) and 32X (CN=3), there is no difference in the number of floral organs except carpel number (Fig. 5; Fig. S2). Most semi-wild Xishuangbanna cucumbers bear fruits with CN=5 and male flowers with increased

petal number (Li et al., 2016). Moreover, unlike most species, such as *Arabidopsis*, maize and tomato, no significant phenotypic changes were observed in the SAM of *CsCLV3* mutant alleles or RNAi lines, despite enlarged FM being observed in the True Lemon versus WI2757 (Li et al., 2016). This is probably due to the unique growth characteristics of cucumber: unisexual flowers are produced from the leaf axils and the SAM is responsible only for continuous leaf generation (Zhao et al., 2018). More severe alleles are needed to explore the function of *CsCLV3* in SAM maintenance in cucumber.

In *Arabidopsis*, *WUS* activates *AGAMOUS* (*AG*) to initiate reproductive development; in turn, *AG* represses *WUS* expression to terminate meristem activity. (Bollier et al., 2018; Lenhard et al., 2001). A *WUS* gain-of-function mutant displays ectopic floral buds phenotype in *Arabidopsis* (Xu et al., 2005), and increased locule number in tomato (Muños et al., 2011). Knockout of *ROSULATA* (*ROA*), a *WUS* ortholog in *Antirrhinum majus*, results in a meristem maintenance defect that is reminiscent of the *wus* phenotype in *Arabidopsis* (Kieffer et al., 2006). In rice, knockout of *OsWUS* produces a tiller-like structure, and an abnormal inflorescence and spikelet (Lu et al., 2015; Tanaka et al., 2015). *HEADLESS*, a



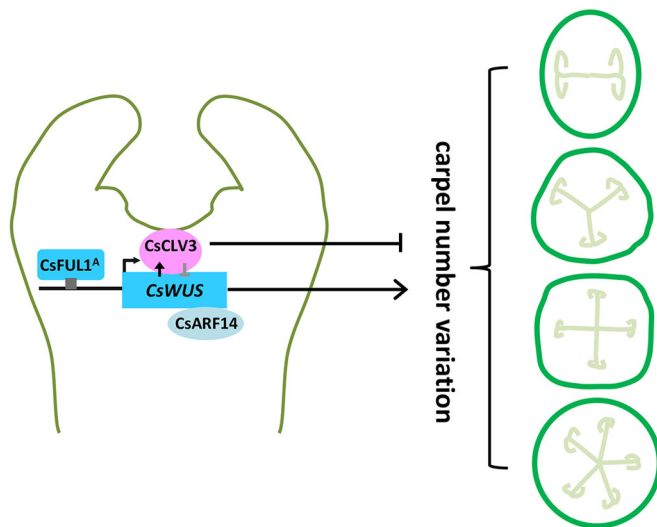

**Fig. 6. A regulatory model involving CsCLV3, CsWUS, CsFUL1 and CsARF14 in specifying carpel number in cucumber.** CsCLV3 acts as a repressor, while CsWUS functions as an activator for carpel number variation in cucumber. CsWUS directly binds to the promoter of CsCLV3 and activates CsCLV3 expression, while CsCLV3 may suppress CsWUS activity indirectly. CsFUL1<sup>A</sup> positively contributes to carpel number increase through direct binding to the promoter of CsWUS and promotes its expression. Auxin participates in carpel number regulation through physical interactions between CsARF14 and CsWUS.

*WUSCHEL* homolog in *Medicago truncatula*, is required for shoot meristem regulation and leaf blade development (Meng et al., 2019). Here, dramatic elevation of *CsWUS* expression is accompanied by increased number of flower organs (Fig. 3), suggesting that *CsWUS* acts as an activator in cucumber carpel number variation (Fig. 6). Taken together, the functions of WUS-CLV3 pathway in shoot apical meristem maintenance and floral organ development appear to be highly conserved, despite the variation in specific floral phenotypes in different plant species.

#### Expression patterns and regulatory network of CsCLV3 and CsWUS in cucumber

In *Arabidopsis*, the WUS-CLV3 feedback loop has been established for controlling the stem cell niche in the SAM, in which WUS activates *CLV3*-expressing stem cells in the meristem apex, and in turn, the CLV3 signaling pathway involving CLV1, CLV2 and other receptors restrict WUS activity in the OC (Brand et al., 2000, 2002; Fletcher et al., 1999; Müller et al., 2006; Schoof et al., 2000). WUS was found to be synthesized in OC cells, and WUS protein migrates into *CLV3*-expressing stem cells and binds to the promoter region of *CLV3* to stimulate its expression (Rodriguez et al., 2016; Yadav et al., 2011). When CLV3 protein accumulates above a certain threshold, it is secreted to the outside of the cell in the form of a small peptide, which will transmit signals to the *WUS* expression region to inhibit the *WUS* expression, thus forming a negative-feedback regulatory loop to maintain the stem cell homeostasis in *Arabidopsis* (Brand et al., 2000; Schoof et al., 2000). However, in rice, the WUS ortholog *TILLERS ABSENT1* (*TAB1*) does not affect SAM maintenance and its expression is detected in premeristem zone and absent in the shoot apex (Tanaka et al., 2015). In maize, *ZmWUS1* is expressed in the center of SAM, whereas *ZmWUS2* is expressed in leaf primordia (Nardmann and Werr, 2006). Here, we have found that *CsWUS* expression is restricted in the central region underneath the central zone in the SAM and FM in cucumber

(Fig. 1), which is similar to that in *Arabidopsis* and tomato (Chu et al., 2019).

In *Arabidopsis*, *CLV3* is specifically expressed in the stem cells and serves as a stem cell marker of the SAM (Müller et al., 2006). In tomato, *SICLV3* is not expressed in the L1 layer and partially overlaps with the *SIWUS* expression domain (Chu et al., 2019). *ZmFCP1* transcripts are accumulated in the leaf primordia and flank of SAM in maize (Je et al., 2016). *LjCLV3* and *GmCLV3* are expressed in the inner layer of the SAM in lotus and soybean, respectively (Okamoto et al., 2011; Wong et al., 2013). Here, we found that *CsCLV3* was expressed in the basal domain of SAM and FM, a region that overlaps with *CsWUS* expression domain in cucumber (Fig. 1). Therefore, the specific expression domains of *WUS* and *CLV3* are quite divergent in different plant species.

Furthermore, our data show that downregulation of *CsCLV3* in the *CsCLV3*-RNAi lines or GFC mutant leads to increased *CsWUS* expression (Figs 2 and 5), whereas overexpression of *CsWUS* results in elevated *CsCLV3* accumulation in *CsWUS-OX* plants (Fig. 3), which is consistent with the classical feedback loop between WUS and CLV3 (Brand et al., 2002; Fletcher et al., 1999; Müller et al., 2006; Schoof et al., 2000; Somssich et al., 2016; Zhou et al., 2018). Biochemical analyses indicated that *CsWUS* can directly bind to *CsCLV3* promoter to stimulate its expression (Fig. 3). Considering the overlapping expression domains of *CsWUS* and *CsCLV3* (Fig. 1), *CsWUS* protein may skip migration to promote *CsCLV3* transcription in cucumber. In addition, overexpression of *CsFUL1<sup>A</sup>* led to increased *CsWUS* expression while decreased *CsCLV3* transcription (Fig. 4G) and *CsFUL1<sup>A</sup>* could directly promote *CsWUS* expression (Fig. 4N-Q), implying that there are additional players other than *CsWUS* that regulate *CsCLV3* transcription during cucumber floral organ development.

#### CsFUL1 and CsARF14 are new players in the CLV3-WUS pathway, regulating CN variation in cucumber

Several regulators have been reported to mediate floral organ numbers through the WUS-CLV pathway, such as HEC1, HAM and HAN in *Arabidopsis* (Schuster et al., 2014; Zhang et al., 2013; Zhao et al., 2004; Zhou et al., 2015, 2018), CT2 in maize (Bommert et al., 2013a), and RRA and FIN in tomato (Xu et al., 2015). The complex of INHIBITOR OF MERISTEM ACTIVITY (IMA) and KNUCLES (KNU) has been shown to bind to the WUS promoter region to repress its activity during flower development in both *Arabidopsis* and tomato (Bollier et al., 2018). In this study, we found that the MADS-box transcription factor *CsFUL1* positively contributes to petal and carpel development via direct binding to the CARG-box at the promoter of *CsWUS* (Fig. 4); thus, the activation of *CsWUS* by *CsFUL1<sup>A</sup>* is strongly associated to carpel number variation in cucumber. *CsFUL1<sup>A</sup>* was shown to be an important regulator for fruit length in cucumber (Zhao et al., 2019), which is consistent with the mapping data indicating the association of carpel number with fruit size, shape and weight (Li et al., 2016). Therefore, *CsFUL1<sup>A</sup>* is a new player in the WUS-CLV pathway mediating carpel number variation and fruit elongation in cucumber (Fig. 6).

Auxin has been shown to be essential for multiple developmental processes, including organogenesis, apical dominance and flowering (Zhao, 2010). The auxin efflux carrier PIN-FORMED1 (PIN1) mediates the local auxin accumulation together with AUX/IAA and ARF family proteins during organogenesis from the SAM (Vernoux et al., 2011). *AUXIN RESPONSE FACTOR3* (*ARF3*) can restrict *WUS* expression by binding to its promoter in *Arabidopsis* (Liu et al., 2014). Here, we have found that auxin content is significantly reduced in the ovary of GFC (CN=5) (Fig. 5),

suggesting a negative role for auxin accumulation in carpel number variation. We further showed that CsARF14 can physically interact with CsWUS protein (Fig. 5), and *CsARF14* displayed overlapping expression with *CsWUS* in the developing ovaries (Fig. 1). *CsARF14* transcription was significantly increased in *CsWUS-OX* plants (Fig. 5J), suggesting that CsWUS may interact with CsARF14 to stimulate *CsARF14* expression. Therefore, *CsARF14* appears to be another player in the WUS-CLV pathway mediating carpel number variation in cucumber (Fig. 6). Similar to the reduced auxin content, the ABA level was less accumulated in the GFC (Fig. S4), but the specific roles of ABA in cucumber carpel number variation need further investigation. Future studies using the CRISPR/CAS9 system to obtain knockout transgenic lines of *CsCLV3-CsWUS* pathway genes and regulators would be promising to shed light on the regulatory network of SAM maintenance, floral organ specification and fruit development in cucumber.

## MATERIALS AND METHODS

### Plant materials and growth conditions

Cucumber inbred line R1461 was used for expression analysis and genetic transformation. Inbred line GFC is a spontaneous mutant derived from line 32X. Cucumber cultivars R1461, HP, Q60 and JB were selected for different carpel numbers, and selfed for three generations prior to this study. The cucumber seedlings were germinated in an incubator at 28°C in the dark overnight and grown in a growth chamber at 16 h light at 25°C and 8 h dark at 18°C. Seedlings were then transferred to the greenhouse at China Agricultural University in Beijing under standard growth conditions at the two true-leaf stage.

### Gene cloning and phylogenetic analysis

Total DNA was extracted from the female bud of R1461, 32X and GFC using a DNA extraction kit (Waring). The whole-length genomic sequence of *CsCLV3* and *CsWUS* were obtained using gene-specific primers (Table S3). Total RNA of female buds was extracted using a Quick RNA Isolation Kit (Waring, Beijing, China) and cDNAs were synthesized using TianScript II RT Kit (Tiangen Biotech, Beijing, China). The coding sequence of *CsCLV3* and *CsWUS* was cloned using gene-specific primers (Table S3). The amino acid sequence of *CsCLV3* and *CsWUS* homologs in other species was obtained from the National Center for Biotechnology Information database ([www.ncbi.nlm.nih.gov](http://www.ncbi.nlm.nih.gov)). Protein alignment was performed using the ClustalW in the MEGA5 software package, and the conserved domains were compared using the BoxShade website ([www.ch.embnet.org/software/BOX\\_form.html](http://www.ch.embnet.org/software/BOX_form.html)). The cucurbit CLE protein sequences were obtained from the Cucurbit Genomic Database ([www.icugi.org/](http://www.icugi.org/)) and the GenBank database. The phylogenetic tree was analyzed by Neighbor Joining method with 1000 bootstraps in the MEGA5.2 software.

### Quantitative real-time RT-PCR (qRT-PCR)

The cucumber fruits at different stages were used for RNA extraction and the synthesized cDNA was used as the template for real-time RT-PCR. The SYBR Premix Ex Taq Mix (Takara) was used for qRT-PCR analysis on an Applied Biosystems 7500 real-time PCR system. The cucumber *UBIQUITIN EXTENSION PROTEIN (UBI-EP, Csa000874)* was used as an internal reference gene. Three biological replicates and three technique replicates were performed for each qRT-PCR analysis. The gene-specific primers are listed in Table S3.

### In situ hybridization

Cucumber shoot apex, female buds, male buds and young fruits were sampled from 14-day-, 16-day-, 18-day- and 20-day-old seedlings of inbred line R1461. All samples were fixed, sectioned and hybridized as previously described (Liu et al., 2018). Sense and antisense probes of *CsCLV3* and *CsWUS* were designed using the whole coding sequence (Table S3).

### Cucumber transformation

To generate *CsCLV3*-RNAi construct, the full-length of *CsCLV3* coding sequence was cloned and inversely inserted into the pFGC1008 vector. The full-length CDS of *CsWUS* was inserted into the PBI121 vector to generate the overexpression construct. The *CsCLV3*-RNAi and *CsWUS*-OX construct was introduced into *Agrobacterium* by electroporation and then transformed into cucumber as previously described (Ding et al., 2015a). The gene-specific primers used for vector construction are listed in Table S3.

### Yeast two hybrid assay

Full length coding sequence of CsWUS and CsARF14 genes were inserted into pGADT7 (bait vector) and pGBKT7 (prey vector) (Table S3). All constructs were confirmed by sequencing before transformation into yeast strain AH109. Yeast two hybrid assays were performed according to the description of Matchmaker TM GAL4 Two-Hybrid System 3 & Libraries (Clontech). AtHAN-AD and AtHAN-BD were used as positive controls (Zhang et al., 2013).

### Bimolecular fluorescence complementation (BiFC) assay

The coding sequence of CsWUS and CsARF14 (without stop codon) were transfected into the YFP vectors (pSPYCE-35S and pSPYNE-35S). The resultant constructs were transformed into the *Agrobacterium tumefaciens* strain GV3101. Each combination of two genes was transfected to the mature leaves of 1-month-old *Nicotiana benthamiana* as previously described (Ding et al., 2015a). The infected tobacco leaves were cut down and observed using a Zeiss LSM 510 Meta confocal laser microscope under 488 nm excitation wavelength. A combination of AtIND-YFPC and AtSPT-YFPN was served as a positive control (Girin et al., 2011). The gene-specific primers used for BiFC are listed in Table S3.

### IAA immunolocalization

Young fruits of cucumber inbred lines 32X and GFC were sampled in pre-cooled 3% N-(3-dimethylaminopropyl)-N'-ethylcarbodiimide hydrochloride (EDC) for 1 h dark at 4°C, and then put in paraformaldehyde for fixation overnight. The fixed samples were dehydrated, embedded, sectioned, dewaxed and incubated with the primary anti-auxin antibody (mouse monoclonal; Sigma-Aldrich, 1:1000, A0855) as described previously (Liu et al., 2018). The secondary antibody (DylightTM 488-labeled antibody to mouse IgG; Sigma-Aldrich, 1:250, 072031806) was applied on slides and incubated for 4 h at room temperature in dark. After washing with 10 mM phosphate-buffered saline (PBS) twice for 5 min, specimens were mounted with 50% glycerin and imaged under a LSM 510 fluorescent microscope (Zeiss). The negative control images of ovary without anti-auxin antibody and a positive control of the ovule in wild type were taken under the same exposure time and setting (Liu et al., 2018).

### Transcriptome analysis

Fruits at anthesis from inbred lines 32X and GFC were used for RNA-seq. Three biological replicates were prepared for each sample. The sequencing information was displayed in Table S1. The RNA-seq library was prepared following the manufacturer's instructions as previously described (Jiang et al., 2015). RNA-seq was performed on an Illumina HiSeq PE150 platform. Bioinformatic analysis was performed as previously described (Zhao et al., 2016). Gene Ontology (GO) term enrichment analysis and MapMan category enrichment were performed using the R package topGO and JAVA software MapMan, respectively (Alexa et al., 2006). The enriched GO terms or categories with a *P*-value less than 0.05 were identified as significant. Sequence data have been deposited in GEO under accession number GSE125899.

### Yeast one hybrid assay

The *CsFUL1<sup>A</sup>* and *CsWUS*-coding sequences were cloned into the pGADT7 vector (Clontech). The CARG-box fragments at the promoter of *CsWUS* and the TAAT-box fragments at the promoter of *CsCLV3* were cloned with the pAbAi vector (Clontech). The resultant constructs were transformed into the yeast Y1H Gold strain according to manufacturer's instructions and selected by optimal AbA (Aureobasidin A) concentration on the SD/-LEU (Synthetic Dropout Medium/-Leucine) medium



(Clontech). AtIND-AD and AtPID-Ebox were used as positive controls (Zhao et al., 2019). Primers for oligonucleotide synthesis were listed in Table S3.

### LUC assay

The 2000 bp upstream sequence of *CsWUS* was cloned and linked with pCambia 1381 and introduced into *Agrobacterium* GV3101 together with pSuper1300 promoter connecting *CsFUL1<sup>A</sup>* and *CsFUL1<sup>C</sup>*. The ~2000 bp upstream sequence of *CsCLV3* was linked with pGreen II 0800-LUC as a reporter and *CsWUS* CDS was linked with pGreen 62SK as effector. The bacterial fluid was injected into young leaves of *Nicotiana benthamiana*. The GUS/LUC ratio reflected the intensity of protein and DNA binding. GUS activity was measured using the methyl umbelliferyl glucuronide (Sigma-Aldrich). Luciferase (LUC) was measured using luciferin (Promega) and was used as an internal control. Primers for oligonucleotide synthesis are listed in Table S3.

### ChIP-qPCR

ChIP-qPCR was performed as described previously (Ding et al., 2015b). The sonicated chromatin from vector control, *35S::CsWUS*, *35S::CsFUL1<sup>A</sup>* and *35S::CsFUL1<sup>C</sup>* transgenic cucumber lines was used as input and stored at -20°C. An anti-myc antibody was used in the immunoprecipitation reactions, and the complex of chromatin antibody was captured by protein A beads (Abcam). The final DNA was purified using a QIAquick PCR Purification Kit (QIAGEN, Germany) and used in qRT-PCR. Three technical repeats and three biological replicates were performed for each sequence segment. The primer pairs used in ChIP-qPCR are listed in Table S3.

### Acknowledgements

The authors are grateful to Dr Xuexian Li for critical reading and comments on the manuscript, and to members of the Zhang lab for technical assistance and discussions.

### Competing interests

The authors declare no competing or financial interests.

### Author contributions

Methodology: G.C., R.G.; Validation: G.C., R.G.; Formal analysis: J.Z.; Investigation: G.C., R.G., J.Z., X.L., H.Z., Z.C., J.S., Z.W.; Resources: X.S., R.L., L.Y., Y.W.; Writing - original draft: G.C.; Visualization: G.C.; Supervision: X.Z.

### Funding

This study was supported by the National Key Research and Development Program of China [2018YFD1000800], National Natural Science Foundation of China [31930097, 31772315 and 31572132], 111 Project [B17043], the Construction of Beijing Science and Technology Innovation and Service Capacity in Top Subjects [CEFF-PXM2019\_014207\_000032] and the Project for Extramural Scientists of the State Key Laboratory of Agrobiotechnology [2020SKLAB6-22].

### Data availability

Sequence data have been deposited in GEO under accession number GSE125899. All sequences of the genes used in this study can be found in NCBI, the Cucurbit Database or GenBank under the accession numbers listed in Table S4.

### Supplementary information

Supplementary information available online at <http://dev.biologists.org/lookup/doi/10.1242/dev.184788.supplemental>

### Peer review history

The peer review history is available online at <https://dev.biologists.org/lookup/doi/10.1242/dev.184788.reviewer-comments.pdf>

### References

Alexa, A., Rahnenfuhrer, J. and Lengauer, T. (2006). Improved scoring of functional groups from gene expression data by decorrelating GO graph structure. *Bioinformatics* **22**, 1600-1607. doi:10.1093/bioinformatics/btl140

Bai, S.-L., Peng, Y.-B., Cui, J.-X., Gu, H.-T., Xu, L.-Y., Li, Y.-Q., Xu, Z.-H. and Bai, S.-N. (2004). Developmental analyses reveal early arrests of the spore-bearing parts of reproductive organs in unisexual flowers of cucumber (*Cucumis sativus* L.). *Planta* **220**, 230-240. doi:10.1007/s00425-004-1342-2

Bleckmann, A., Weidtkamp-Peters, S., Seidel, C. A. M. and Simon, R. (2010). Stem cell signaling in Arabidopsis requires CRN to localize CLV2 to the plasma membrane. *Plant Physiol.* **152**, 166-176. doi:10.1104/pp.109.149930

Bollier, N., Sicard, A., Leblond, J., Latrasse, D., Gonzalez, N., Gévaudant, F., Benhamed, M., Raynaud, C., Lenhard, M., Chevalier, C. et al. (2018). At-MINI ZINC FINGER2 and SI-INHIBITOR OF MERISTEM ACTIVITY, a conserved missing link in the regulation of floral meristem termination in Arabidopsis and tomato. *Plant Cell* **30**, 83-100. doi:10.1105/tpc.17.00653

Bommert, P., Je, B. I., Goldshmidt, A. and Jackson, D. (2013a). The maize *Gα* gene COMPACT PLANT2 functions in CLAVATA signalling to control shoot meristem size. *Nature* **502**, 555-558. doi:10.1038/nature12583

Bommert, P., Nagasawa, N. S. and Jackson, D. (2013b). Quantitative variation in maize kernel row number is controlled by the FASCIATED EAR2 locus. *Nat. Genet.* **45**, 334-337. doi:10.1038/ng.2534

Brand, U., Fletcher, J. C., Hobe, M., Meyerowitz, E. M. and Simon, R. (2000). Dependence of stem cell fate in Arabidopsis on a feedback loop regulated by CLV3 activity. *Science* **289**, 617-619. doi:10.1126/science.289.5479.617

Brand, U., Grunewald, M., Hobe, M. and Simon, R. (2002). Regulation of CLV3 expression by two homeobox genes in Arabidopsis. *Plant Physiol.* **129**, 565-575. doi:10.1104/pp.001867

Chu, H., Qian, Q., Liang, W., Yin, C., Tan, H., Yao, X., Yuan, Z., Yang, J., Huang, H., Luo, D. et al. (2006). The floral organ number4 gene encoding a putative ortholog of Arabidopsis CLAVATA3 regulates apical meristem size in rice. *Plant Physiol.* **142**, 1039-1052. doi:10.1104/pp.106.086736

Chu, Y.-H., Jang, J.-C., Huang, Z. and van der Knaap, E. (2019). Tomato locule number and fruit size controlled by natural alleles of *lc* and *fas*. *Plant Direct* **3**, e00142. doi:10.1002/pld3.142

Clark, S. E., Williams, R. W. and Meyerowitz, E. M. (1997). The CLAVATA1 gene encodes a putative receptor kinase that controls shoot and floral meristem size in Arabidopsis. *Cell* **89**, 575-585. doi:10.1016/S0092-8674(00)80239-1

Cock, J. M. and McCormick, S. (2001). A large family of genes that share homology with CLAVATA3. *Plant Physiol.* **126**, 939-942. doi:10.1104/pp.126.3.939

DeYoung, B. J., Bickle, K. L., Schrage, K. J., Muskett, P., Patel, K. and Clark, S. E. (2006). The CLAVATA1-related BAM1, BAM2 and BAM3 receptor kinase-like proteins are required for meristem function in Arabidopsis. *Plant J.* **45**, 1-16. doi:10.1111/j.1365-3113X.2005.02592.x

Ding, L., Yan, S., Jiang, L., Liu, M., Zhang, J., Zhao, J., Zhao, W., Han, Y.-Y., Wang, Q. and Zhang, X. (2015a). HANABA TARANU regulates the shoot apical meristem and leaf development in cucumber (*Cucumis sativus* L.). *J. Exp. Bot.* **66**, 7075-7087. doi:10.1093/jxb/erv409

Ding, L., Yan, S., Jiang, L., Zhao, W., Ning, K., Zhao, J., Liu, X., Zhang, J., Wang, Q. and Zhang, X. (2015b). HANABA TARANU (HAN) bridges meristem and organ primordia boundaries through PINHEAD, JAGGED, BLADE-ON-PETIOLE2 and CYTOKININ OXIDASE 3 during flower development in Arabidopsis. *PLoS Genet.* **11**, e1005479. doi:10.1371/journal.pgen.1005479

Doebley, J. F., Gaut, B. S. and Smith, B. D. (2006). The molecular genetics of crop domestication. *Cell* **127**, 1309-1321. doi:10.1016/j.cell.2006.12.006

Fan, C., Wu, Y., Yang, Q., Yang, Y., Meng, Q., Zhang, K., Li, J., Wang, J. and Zhou, Y. (2014). A novel single-nucleotide mutation in a CLAVATA3 gene homolog controls a multilocular silique trait in Brassica rapa L. *Molecular plant* **7**, 1788-1792. doi:10.1093/mp/ssu090

Fiers, M., Golemic, E., Xu, J., van der Geest, L., Heidstra, R., Stiekema, W. and Liu, C.-M. (2005). The 14-amino acid CLV3, CLE19, and CLE40 peptides trigger consumption of the root meristem in Arabidopsis through a CLAVATA2-dependent pathway. *Plant Cell* **17**, 2542-2553. doi:10.1105/tpc.105.034009

Fletcher, J. C. (2018). The CLV-WUS stem cell signaling pathway: a roadmap to crop yield optimization. *Plants (Basel)* **7**, 87. doi:10.3390/plants7040087

Fletcher, J. C., Brand, U., Running, M. P., Simon, R. and Meyerowitz, E. M. (1999). Signaling of cell fate decisions by CLAVATA3 in Arabidopsis shoot meristems. *Science* **283**, 1911-1914. doi:10.1126/science.283.5409.1911

Gaillolchet, C., Daum, G. and Lohmann, J. U. (2015). O cell, where art thou? The mechanisms of shoot meristem patterning. *Curr. Opin. Plant Biol.* **23**, 91-97. doi:10.1016/j.pbi.2014.11.002

Girin, T., Paicu, T., Stephenson, P., Fuentes, S., Körner, E., O'Brien, M., Sorefan, K., Wood, T. A., Balanzá, V., Ferrándiz, C. et al. (2011). INDEHISCENT and SPATULA interact to specify carpel and valve margin tissue and thus promote seed dispersal in Arabidopsis. *Plant Cell* **23**, 3641-3653. doi:10.1105/tpc.111.090944

Gu, C., Guo, Z.-H., Hao, P.-P., Wang, G.-M., Jin, Z.-M. and Zhang, S.-L. (2017). Multiple regulatory roles of AP2/ERF transcription factor in angiosperm. *Botanical Studies* **58**, 6. doi:10.1186/s40529-016-0159-1

Guo, Y., Han, L., Hymes, M., Denver, R. and Clark, S. E. (2010). CLAVATA2 forms a distinct CLE-binding receptor complex regulating Arabidopsis stem cell specification. *Plant J.* **63**, 889-900. doi:10.1111/j.1365-3113X.2010.04295.x

Hwang, I. and Sheen, J. (2001). Two-component circuitry in Arabidopsis cytokinin signal transduction. *Nature* **413**, 383-389. doi:10.1038/35096500

Ikeda, M., Mitsuda, N. and Ohme-Takagi, M. (2009). Arabidopsis WUSCHEL is a bifunctional transcription factor that acts as a repressor in stem cell regulation and as an activator in floral patterning. *Plant Cell* **21**, 3493-3505. doi:10.1105/tpc.109.069997

- Je, B. I., Gruel, J., Lee, Y. K., Bommert, P., Arevalo, E. D., Eveland, A. L., Wu, Q., Goldshmidt, A., Meeley, R., Bartlett, M. et al. (2016). Signaling from maize organ primordia via FASCIATED EAR3 regulates stem cell proliferation and yield traits. *Nat. Genet.* **48**, 785–791. doi:10.1038/ng.3567
- Jeong, S., Trotochaud, A. E. and Clark, S. E. (1999). The Arabidopsis CLAVATA2 gene encodes a receptor-like protein required for the stability of the CLAVATA1 receptor-like kinase. *Plant Cell* **11**, 1925–1934. doi:10.1105/tpc.11.10.1925
- Jiang, L., Yan, S., Yang, W., Li, Y., Xia, M., Chen, Z., Wang, Q., Yan, L., Song, X., Liu, R. et al. (2015). Transcriptomic analysis reveals the roles of microtubule-related genes and transcription factors in fruit length regulation in cucumber (*Cucumis sativus* L.). *Sci. Rep.* **5**, 8031. doi:10.1038/srep08031
- Kieffer, M., Stern, Y., Cook, H., Clerici, E., Maulbetsch, C., Laux, T. and Davies, B. (2006). Analysis of the transcription factor WUSCHEL and its functional homologue in *Antirrhinum* reveals a potential mechanism for their roles in meristem maintenance. *Plant Cell* **18**, 560–573. doi:10.1105/tpc.105.039107
- Kinoshita, A., Betsuyaku, S., Osakabe, Y., Mizuno, S., Nagawa, S., Stahl, Y., Simon, R., Yamaguchi-Shinozaki, K., Fukuda, H. and Sawa, S. (2010). RPK2 is an essential receptor-like kinase that transmits the CLV3 signal in Arabidopsis. *Development* **137**, 3911–3920. doi:10.1242/dev.048199
- Kuittinen, H. and Aguade, M. (2000). Nucleotide variation at the CHALCONE ISOMERASE locus in Arabidopsis thaliana. *Genetics* **155**, 863–872.
- Laux, T., Mayer, K. F., Berger, J. and Jürgens, G. (1996). The WUSCHEL gene is required for shoot and floral meristem integrity in Arabidopsis. *Development* **122**, 87–96.
- Leibfried, A., To, J. P. C., Busch, W., Stehling, S., Kehle, A., Demar, M., Kieber, J. J. and Lohmann, J. U. (2005). WUSCHEL controls meristem function by direct regulation of cytokinin-inducible response regulators. *Nature* **438**, 1172–1175. doi:10.1038/nature04270
- Lenhard, M. and Laux, T. (2003). Stem cell homeostasis in the Arabidopsis shoot meristem is regulated by intercellular movement of CLAVATA3 and its sequestration by CLAVATA1. *Development* **130**, 3163–3173. doi:10.1242/dev.00525
- Lenhard, M., Bohnert, A., Jürgens, G. and Laux, T. (2001). Termination of stem cell maintenance in Arabidopsis floral meristems by interactions between WUSCHEL and AGAMOUS. *Cell* **105**, 805–814. doi:10.1016/S0092-8674(01)00390-7
- Li, S., Pan, Y., Wen, C., Li, Y., Liu, X., Zhang, X., Behera, T. K., Xing, G. and Weng, Y. (2016). Integrated analysis in bi-parental and natural populations reveals CsCLAVATA3 (CsCLV3) underlying carpel number variations in cucumber. *Theor. Appl. Genet.* **129**, 1007–1022. doi:10.1007/s00122-016-2679-1
- Liu, X., Dinh, T. T., Li, D., Shi, B., Li, Y., Cao, X., Guo, L., Pan, Y., Jiao, Y. and Chen, X. (2014). AUXIN RESPONSE FACTOR 3 integrates the functions of AGAMOUS and APETALA2 in floral meristem determinacy. *Plant J.* **80**, 629–641. doi:10.1111/tpj.12658
- Liu, X., Ning, K., Che, G., Yan, S., Han, L., Gu, R., Li, Z., Weng, Y. and Zhang, X. (2018). CsSPL functions as an adaptor between HD-ZIP III and CsWUS transcription factors regulating anther and ovule development in *Cucumis sativus* (cucumber). *Plant J.* **94**, 535–547. doi:10.1111/tpj.13877
- Lu, Z., Shao, G., Xiong, J., Jiao, Y., Wang, J., Liu, G., Meng, X., Liang, Y., Xiong, G., Wang, Y. et al. (2015). MONOCULM 3, an ortholog of WUSCHEL in rice, is required for tiller bud formation. *J. Genet. Genomics* **42**, 71–78. doi:10.1016/j.jgg.2014.12.005
- Mayer, K. F. X., Schoof, H., Haecker, A., Lenhard, M., Jürgens, G. and Laux, T. (1998). Role of WUSCHEL in regulating stem cell fate in the Arabidopsis shoot meristem. *Cell* **95**, 805–815. doi:10.1016/S0092-8674(00)81703-1
- Meng, Y., Liu, H., Wang, H., Liu, Y., Zhu, B., Wang, Z., Hou, Y., Zhang, P., Wen, J., Yang, H. et al. (2019). HEADLESS, a WUSCHEL homolog, uncovers novel aspects of shoot meristem regulation and leaf blade development in *Medicago truncatula*. *J. Exp. Bot.* **70**, 149–163. doi:10.1093/jxb/ery346
- Miwa, H., Kinoshita, A., Fukuda, H. and Sawa, S. (2009). Plant meristems: CLAVATA3/ESR-related signaling in the shoot apical meristem and the root apical meristem. *J. Plant Res.* **122**, 31–39. doi:10.1007/s10265-008-0207-3
- Müller, R., Borghi, L., Kwiatkowska, D., Laufs, P. and Simon, R. (2006). Dynamic and compensatory responses of Arabidopsis shoot and floral meristems to CLV3 signaling. *Plant Cell* **18**, 1188–1198. doi:10.1105/tpc.105.040444
- Müller, R., Bleckmann, A. and Simon, R. (2008). The receptor kinase CORYNE of Arabidopsis transmits the stem cell-limiting signal CLAVATA3 independently of CLAVATA1. *Plant Cell* **20**, 934–946. doi:10.1105/tpc.107.057547
- Muñoz, S., Ranc, N., Botton, E., Bérard, A., Rolland, S., Duffé, P., Carretero, Y., Le Paslier, M.-C., Delalande, C., Bouzayen, M. et al. (2011). Increase in tomato locule number is controlled by two single-nucleotide polymorphisms located near WUSCHEL. *Plant Physiol.* **156**, 2244–2254. doi:10.1104/pp.111.173997
- Nardmann, J. and Werr, W. (2006). The shoot stem cell niche in angiosperms: expression patterns of WUS orthologues in rice and maize imply major modifications in the course of mono- and dicot evolution. *Mol. Biol. Evol.* **23**, 2492–2504. doi:10.1093/molbev/msl125
- Ogawa, M., Shinohara, H., Sakagami, Y. and Matsubayashi, Y. (2008). Arabidopsis CLV3 peptide directly binds CLV1 ectodomain. *Science* **319**, 294. doi:10.1126/science.1150083
- Okamoto, S., Nakagawa, T. and Kawaguchi, M. (2011). Expression and functional analysis of a CLV3-like gene in the model legume *Lotus japonicus*. *Plant Cell Physiol.* **52**, 1211–1221. doi:10.1093/pcp/pcr071
- Perales, M., Rodriguez, K., Snipes, S., Yadav, R. K., Diaz-Mendoza, M. and Reddy, G. V. (2016). Threshold-dependent transcriptional discrimination underlies stem cell homeostasis. *Proc. Natl Acad. Sci. USA* **113**, E6298–E6306. doi:10.1073/pnas.1607669113
- Qi, T., Huang, H., Song, S. and Xie, D. (2015). Regulation of jasmonate-mediated stamen development and seed production by a bHLH-MYB complex in Arabidopsis. *Plant Cell* **27**, 1620–1633. doi:10.1105/tpc.15.00116
- Replogle, A., Wang, J., Paolillo, V., Smeda, J., Kinoshita, A., Durbak, A., Tax, F. E., Wang, X., Sawa, S. and Mitchum, M. G. (2013). Synergistic interaction of CLAVATA1, CLAVATA2, and RECEPTOR-LIKE PROTEIN KINASE 2 in cyst nematode parasitism of Arabidopsis. *Mol. Plant Microbe Interact.* **26**, 87–96. doi:10.1094/MPMI-05-12-0118-FI
- Rodriguez, K., Perales, M., Snipes, S., Yadav, R. K., Diaz-Mendoza, M. and Reddy, G. V. (2016). DNA-dependent homodimerization, sub-cellular partitioning, and protein destabilization control WUSCHEL levels and spatial patterning. *Proc. Natl. Acad. Sci. USA* **113**, E6307–E6315. doi:10.1073/pnas.1607673113
- Rodríguez-Leal, D., Lemmon, Z. H., Man, J., Bartlett, M. E. and Lippman, Z. B. (2017). Engineering quantitative trait variation for crop improvement by genome editing. *Cell* **171**, 470–480.e478. doi:10.1016/j.cell.2017.08.030
- Rojo, E., Sharma, V. K., Kovaleva, V., Raikhel, N. V. and Fletcher, J. C. (2002). CLV3 is localized to the extracellular space, where it activates the Arabidopsis CLAVATA stem cell signaling pathway. *Plant Cell* **14**, 969–977. doi:10.1105/tpc.002196
- Schoof, H., Lenhard, M., Haecker, A., Mayer, K. F. X., Jürgens, G. and Laux, T. (2000). The stem cell population of Arabidopsis shoot meristems is maintained by a regulatory loop between the CLAVATA and WUSCHEL genes. *Cell* **100**, 635–644. doi:10.1016/S0092-8674(00)80700-X
- Schuster, C., Gailloch, C., Medzihradsky, A., Busch, W., Daum, G., Krebs, M., Kehle, A. and Lohmann, J. U. (2014). A regulatory framework for shoot stem cell control integrating metabolic, transcriptional, and phytohormone signals. *Dev. Cell* **28**, 438–449. doi:10.1016/j.devcel.2014.01.013
- Shao, G., Lu, Z., Xiong, J., Wang, B., Jing, Y., Meng, X., Liu, G., Ma, H., Liang, Y., Chen, F. et al. (2019). Tiller bud formation regulators MOC1 and MOC3 cooperatively promote tiller bud outgrowth by activating FON1 expression in rice. *Mol. Plant* **12**, 1090–1102. doi:10.1016/j.molp.2019.04.008
- Smaczniak, C., Immink, R. G. H., Muino, J. M., Blanvillain, R., Busscher, M., Busscher-Lange, J., Dinh, Q. D., Liu, S., Westphal, A. H., Boeren, S. et al. (2012). Characterization of MADS-domain transcription factor complexes in Arabidopsis flower development. *Proc. Natl. Acad. Sci. USA* **109**, 1560–1565. doi:10.1073/pnas.1112871109
- Smyth, D. R., Bowman, J. L. and Meyerowitz, E. M. (1990). Early flower development in Arabidopsis. *Plant Cell* **2**, 755–767. doi:10.1105/tpc.2.8.755
- Somssich, M., Je, B. I., Simon, R. and Jackson, D. (2016). CLAVATA-WUSCHEL signaling in the shoot meristem. *Development* **143**, 3238–3248. doi:10.1242/dev.133645
- Soyars, C. L., James, S. R. and Nimchuk, Z. L. (2016). Ready, aim, shoot: stem cell regulation of the shoot apical meristem. *Curr. Opin. Plant Biol.* **29**, 163–168. doi:10.1016/j.pbi.2015.12.002
- Sun, B., Xu, Y., Ng, K.-H. and Ito, T. (2009). A timing mechanism for stem cell maintenance and differentiation in the Arabidopsis floral meristem. *Genes Dev.* **23**, 1791–1804. doi:10.1101/gad.1800409
- Suzaki, T., Toriba, T., Fujimoto, M., Tsutsumi, N., Kitano, H. and Hirano, H.-Y. (2006). Conservation and diversification of meristem maintenance mechanism in *Oryza sativa*: function of the FLORAL ORGAN NUMBER2 gene. *Plant Cell Physiol.* **47**, 1591–1602. doi:10.1093/pcp/pcl025
- Tanaka, W., Ohmori, Y., Ushijima, T., Matsusaka, H., Matsushita, T., Kumamaru, T., Kawano, S. and Hirano, H.-Y. (2015). Axillary meristem formation in rice requires the WUSCHEL ortholog TILLERS ABSENT1. *Plant Cell* **27**, 1173–1184. doi:10.1105/tpc.15.00074
- van der Graaff, E., Laux, T. and Rensing, S. A. (2009). The WUS homeobox-containing (WOX) protein family. *Genome Biol.* **10**, 248. doi:10.1186/gb-2009-10-12-248
- Vernoux, T., Brunoud, G., Farcot, E., Morin, V., Van den Daele, H., Legrand, J., Oliva, M., Das, P., Larrieu, A., Wells, D. et al. (2011). The auxin signalling network translates dynamic input into robust patterning at the shoot apex. *Mol. Syst. Biol.* **7**, 508. doi:10.1038/msb.2011.39
- Weng, Y., Colle, M., Wang, Y., Yang, L., Rubinstein, M., Sherman, A., Ophir, R. and Grumet, R. (2015). QTL mapping in multiple populations and development stages reveals dynamic quantitative trait loci for fruit size in cucumbers of different market classes. *Theor. Appl. Genet.* **128**, 1747–1763. doi:10.1007/s00122-015-2544-7
- Wong, C. E., Singh, M. B. and Bhalla, P. L. (2013). Spatial expression of CLAVATA3 in the shoot apical meristem suggests it is not a stem cell marker in soybean. *J. Exp. Bot.* **64**, 5641–5649. doi:10.1093/jxb/ert341
- Xu, Y.-Y., Wang, X.-M., Li, J., Li, J.-H., Wu, J.-S., Walker, J. C., Xu, Z.-H. and Chong, K. (2005). Activation of the WUS gene induces ectopic initiation of floral



- meristems on mature stem surface in *Arabidopsis thaliana*. *Plant Mol. Biol.* **57**, 773-784. doi:10.1007/s11103-005-0952-9
- Xu, C., Liberatore, K. L., MacAlister, C. A., Huang, Z., Chu, Y.-H., Jiang, K., Brooks, C., Ogawa-Ohnishi, M., Xiong, G., Pauly, M. et al.** (2015). A cascade of arabinosyltransferases controls shoot meristem size in tomato. *Nat. Genet.* **47**, 784-792. doi:10.1038/ng.3309
- Yadav, R. K. and Reddy, G. V.** (2012). WUSCHEL protein movement and stem cell homeostasis. *Plant Signal. Behav.* **7**, 592-594. doi:10.4161/psb.19793
- Yadav, R. K., Perales, M., Gruel, J., Girke, T., Jonsson, H. and Reddy, G. V.** (2011). WUSCHEL protein movement mediates stem cell homeostasis in the *Arabidopsis* shoot apex. *Genes Dev.* **25**, 2025-2030. doi:10.1101/gad.17258511
- Zhang, X., Zhou, Y., Ding, L., Wu, Z., Liu, R. and Meyerowitz, E. M.** (2013). Transcription repressor HANABA TARANU controls flower development by integrating the actions of multiple hormones, floral organ specification genes, and GATA3 family genes in *Arabidopsis*. *Plant Cell* **25**, 83-101. doi:10.1105/tpc.112.107854
- Zhao, Y.** (2010). Auxin Biosynthesis and Its Role in Plant Development. *Annu. Rev. Plant Biol.* **61**, 49-64. doi:10.1146/annurev-arplant-042809-112308
- Zhao, Y., Medrano, L., Ohashi, K., Fletcher, J. C., Yu, H., Sakai, H. and Meyerowitz, E. M.** (2004). HANABA TARANU is a GATA transcription factor that regulates shoot apical meristem and flower development in *Arabidopsis*. *Plant Cell* **16**, 2586-2600. doi:10.1105/tpc.104.024869
- Zhao, Z., Andersen, S. U., Ljung, K., Dolezal, K., Miotk, A., Schultheiss, S. J. and Lohmann, J. U.** (2010). Hormonal control of the shoot stem-cell niche. *Nature* **465**, 1089-1092. doi:10.1038/nature09126
- Zhao, J., Li, Y., Ding, L., Yan, S., Liu, M., Jiang, L., Zhao, W., Wang, Q., Yan, L., Liu, R. et al.** (2016). Phloem transcriptome signatures underpin the physiological differentiation of the pedicel, stalk and fruit of cucumber (*Cucumis sativus* L.). *Plant Cell Physiol.* **57**, 19-34. doi:10.1093/pcp/pcv168
- Zhao, W., Chen, Z., Liu, X., Che, G., Gu, R., Zhao, J., Wang, Z., Hou, Y. and Zhang, X.** (2018). CsLFY is required for shoot meristem maintenance via interaction with WUSCHEL in cucumber (*Cucumis sativus*). *New Phytol.* **218**, 344-356. doi:10.1111/nph.14954
- Zhao, J., Jiang, L., Che, G., Pan, Y., Li, Y., Hou, Y., Zhao, W., Zhong, Y., Ding, L., Yan, S. et al.** (2019). A functional allele of CsFUL1 regulates fruit length through repressing CsSUP and inhibiting auxin transport in cucumber. *Plant Cell* **31**, 1289-1307. doi:10.1105/tpc.18.00905
- Zhou, Y., Liu, X., Engstrom, E. M., Nimchuk, Z. L., Pruneda-Paz, J. L., Tarr, P. T., Yan, A., Kay, S. A. and Meyerowitz, E. M.** (2015). Control of plant stem cell function by conserved interacting transcriptional regulators. *Nature* **517**, 377-380. doi:10.1038/nature13853
- Zhou, Y., Yan, A., Han, H., Li, T., Geng, Y., Liu, X. and Meyerowitz, E. M.** (2018). HAIRY MERISTEM with WUSCHEL confines CLAVATA3 expression to the outer apical meristem layers. *Science* **361**, 502-506. doi:10.1126/science.aar8638
- Zhu, Y., Wang, Y., Li, R., Song, X., Wang, Q., Huang, S., Jin, J. B., Liu, C.-M. and Lin, J.** (2010). Analysis of interactions among the CLAVATA3 receptors reveals a direct interaction between CLAVATA2 and CORYNE in *Arabidopsis*. *Plant J.* **61**, 223-233. doi:10.1111/j.1365-3113.2009.04049.x
